# Supplementary material for: Reduction of ROS-HIF1α-driven glycolysis by taurine alleviates Streptococcus uberis infection
Source: Royal Society of Chemistry journal article supplement (doi:10.1039/d1fo03909a), 2022-01-01
Supplement: d1fo03909a1.pdf [file d1fo03909a1.pdf]

Table S1 Primer sequences and product size designed for RT-qPCR

| Target gene                     | Forward or Reverse | Primer sequence (5'-3')   |
|---------------------------------|--------------------|---------------------------|
| <i><math>\beta</math>-actin</i> | Forward primer     | TCTGGCACCACACCTTCTA       |
|                                 | Reverse primer     | AGGCATACAGGGACAGCAC       |
| <i>HK2</i>                      | Forward primer     | GATGAAGGTGGAAATGGA        |
|                                 | Reverse primer     | CCTGTGGGATGGAGTAGA        |
| <i>PFK1</i>                     | Forward primer     | TGCCGCTGTTCGCTCTAC        |
|                                 | Reverse primer     | AGCCTCCTCAATCTGACCTTT     |
| <i>EGLN3</i>                    | Forward primer     | GGCAAATACTATGTCAAGGAGC    |
|                                 | Reverse primer     | CGTGTAACCTGGCGTCCC        |
| <i>HIF1<math>\alpha</math></i>  | Forward primer     | TCCAAGCCCTCCAAGTATGA      |
|                                 | Reverse primer     | TGCCTTAGCAGTGGTCGTTT      |
| <i>TNF-<math>\alpha</math></i>  | Forward primer     | CATCTTCTCAAAATTCGAGTGACAA |
|                                 | Reverse primer     | TGGGAGTAGACAAGGTAGAACCC   |
| <i>IL-1<math>\beta</math></i>   | Forward primer     | AACCTGCTGGTGTGTGACGTTC    |
|                                 | Reverse primer     | CAGCACGAGGCTTTTTTGTGT     |

**Figure S1**

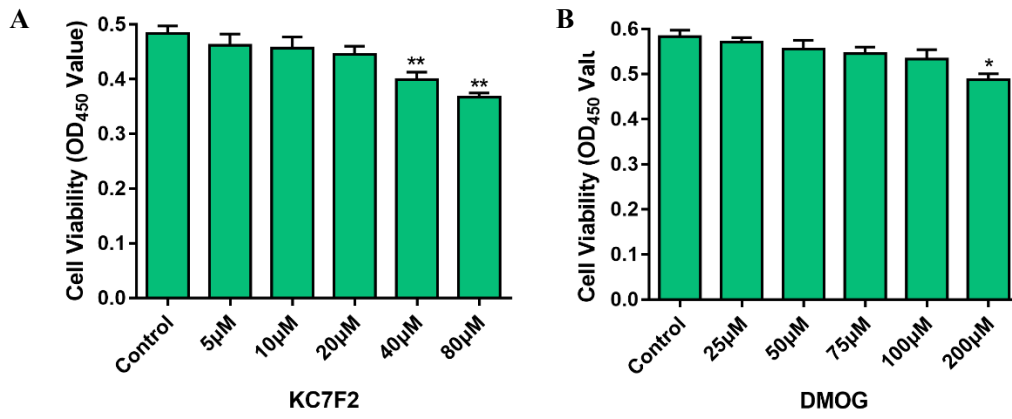

**Figure S1.** The cell viability in treatment of HIF inhibitor or activator. EpH4-Ev cells were treated with KC7F2 or DMOG for 24 h and the cell viability were examined using a CCK-8 assay kit. Data are represented as mean  $\pm$  SEM (n=3). \* $P < 0.05$ , \*\* $P < 0.01$ .
